# Supplementary material for: The molecular structures of pentaborane(9) with halogen substituents in apical and basal positions, determined by electron diffraction and theoretical calculations
Source: Royal Society of Chemistry journal article supplement (doi:10.1039/b402688h), 2004-01-01

Table S1. Calculated geometric parameters and energies for B<sub>5</sub>H<sub>9</sub> (distances in pm, angles in degrees, energy in Hartrees) from the molecular orbital study.<sup>a</sup>

|                                                      | HF/3-21G*  | HF/6-31G*  | B3LYP/6-31G* | MP2/6-31G* |
|------------------------------------------------------|------------|------------|--------------|------------|
| B <sub>(a)</sub> -H <sub>(a)</sub>                   | 117.5      | 118.1      | 118.5        | 118.3      |
| B <sub>(b)</sub> -B <sub>(b)</sub>                   | 182.8      | 181.1      | 179.9        | 178.6      |
| B <sub>(b)</sub> -B <sub>(a)</sub>                   | 170.9      | 170.2      | 169.5        | 169.0      |
| B <sub>(b)</sub> -H <sub>(t)</sub>                   | 117.4      | 117.9      | 118.6        | 118.7      |
| B <sub>(b)</sub> -H <sub>(br)</sub>                  | 134.9      | 134.5      | 134.8        | 134.3      |
| B <sub>(a)</sub> -B <sub>(b)</sub> -H <sub>(t)</sub> | 132.1      | 132.1      | 131.9        | 131.4      |
| H <sub>(br)</sub> drop from<br>basal plane           | 63.8       | 62.9       | 62.9         | 63.3       |
| Energy                                               | -127.82196 | -128.57853 | -129.66273   | -129.05091 |

<sup>a</sup> Subscript (b) = base position, (a) = apex position, (t) = terminal and (br) = bridging.

Table S2. Calculated geometric parameters and energies for 1-F-B<sub>5</sub>H<sub>8</sub> (distances in pm, angles in degrees, energy in Hartrees) from the molecular orbital study.<sup>a</sup>

|                                                      | HF/3-21G*  | HF/6-31G*  | B3LYP/6-31G* | MP2/6-31G* |
|------------------------------------------------------|------------|------------|--------------|------------|
| B-F                                                  | 138.7      | 135.9      | 136.6        | 137.3      |
| B <sub>(b)</sub> -B <sub>(b)</sub>                   | 182.7      | 181.4      | 180.1        | 178.9      |
| B <sub>(b)</sub> -B <sub>(a)</sub>                   | 170.7      | 170.7      | 170.2        | 169.7      |
| B <sub>(b)</sub> -H <sub>(t)</sub>                   | 117.3      | 117.9      | 118.5        | 118.6      |
| B <sub>(b)</sub> -H <sub>(br)</sub>                  | 134.4      | 134.3      | 134.6        | 134.1      |
| B <sub>(a)</sub> -B <sub>(b)</sub> -H <sub>(t)</sub> | 131.7      | 131.6      | 131.2        | 130.6      |
| H <sub>(br)</sub> drop from<br>basal plane           | 64.0       | 62.8       | 62.5         | 62.9       |
| Energy                                               | -226.20862 | -227.47597 | -228.94273   | -228.11597 |

<sup>a</sup> Subscript (b) = base position, (a) = apex position, (t) = terminal and (br) = bridging.

Table S3. Calculated geometric parameters and energies for 1-Cl-B<sub>5</sub>H<sub>8</sub> (distances in pm, angles in degrees, energy in Hartrees) from the molecular orbital study.<sup>a</sup>

|                                                      | HF/3-21G*  | HF/6-31G*  | B3LYP/6-31G* | MP2/6-31G* |
|------------------------------------------------------|------------|------------|--------------|------------|
| B-Cl                                                 | 179.7      | 180.6      | 180.4        | 178.1      |
| B <sub>(b)</sub> -B <sub>(b)</sub>                   | 182.9      | 181.5      | 180.1        | 178.9      |
| B <sub>(b)</sub> -B <sub>(a)</sub>                   | 170.6      | 169.8      | 169.5        | 168.9      |
| B <sub>(b)</sub> -H <sub>(t)</sub>                   | 117.3      | 117.8      | 118.4        | 118.6      |
| B <sub>(b)</sub> -H <sub>(br)</sub>                  | 134.5      | 134.3      | 134.6        | 134.2      |
| B <sub>(a)</sub> -B <sub>(b)</sub> -H <sub>(t)</sub> | 131.7      | 131.6      | 131.3        | 130.5      |
| H <sub>(br)</sub> drop from<br>basal plane           | 63.5       | 62.6       | 62.4         | 62.8       |
| Energy                                               | -584.68845 | -587.52104 | -589.29616   | -588.12114 |

<sup>a</sup> Subscript (b) = base position, (a) = apex position, (t) = terminal and (br) = bridging.

Table S4. Calculated geometric parameters and energies for 1-Br-B<sub>5</sub>H<sub>8</sub> (distances in pm, angles in degrees, energy in Hartrees) from the molecular orbital study.<sup>a</sup>

|                                                      | HF/3-21G*   | HF/6-31G*   | B3LYP/6-31G* | MP2/6-31G*  | MP2(fc)/6-311+G* | MP4(fc)(SDQ)/6-31G* |
|------------------------------------------------------|-------------|-------------|--------------|-------------|------------------|---------------------|
| B-Br                                                 | 192.7       | 195.2       | 194.6        | 193.3       | 194.0            | 193.3               |
| B <sub>(b)</sub> -B <sub>(b)</sub>                   | 182.5       | 181.5       | 180.1        | 178.9       | 179.7            | 179.5               |
| B <sub>(b)</sub> -B <sub>(a)</sub>                   | 170.7       | 169.7       | 169.3        | 168.8       | 169.7            | 168.8               |
| B <sub>(b)</sub> -H <sub>(t)</sub>                   | 117.3       | 117.8       | 118.4        | 118.6       | 118.5            | 118.6               |
| B <sub>(b)</sub> -H <sub>(br)</sub>                  | 134.4       | 134.3       | 134.7        | 134.2       | 135.1            | 134.2               |
| B <sub>(a)</sub> -B <sub>(b)</sub> -H <sub>(t)</sub> | 131.9       | 131.7       | 131.4        | 130.7       | 131.3            | 130.7               |
| H <sub>(br)</sub> drop from basal plane              | 64.2        | 62.6        | 62.5         | 62.9        | 63.5             | 62.7                |
| Energy                                               | -2687.56334 | -2697.92979 | -2700.80452  | -2698.51162 | -2701.0457       | -2698.5633          |

<sup>a</sup> Subscript (b) = base position, (a) = apex position, (t) = terminal and (br) = bridging.

Table S5. Calculated geometric parameters and energies for 2-F-B<sub>5</sub>H<sub>8</sub> (distances in pm, angles in degrees, energy in Hartrees) from the molecular orbital study.

|                 | HF/3-21G*  | HF/6-31G*  | B3LYP/6-31G* | MP2/6-31G* |
|-----------------|------------|------------|--------------|------------|
| B(1)-H(7)       | 117.5      | 118.1      | 118.5        | 118.3      |
| B(2)-F(6)       | 136.1      | 132.8      | 134.1        | 135.2      |
| B(3)-H(8)       | 117.3      | 117.8      | 118.4        | 118.5      |
| B(4)-H(9)       | 117.3      | 117.9      | 118.5        | 118.6      |
| B(2)-B(4)       | 182.8      | 181.6      | 180.5        | 179.4      |
| B(4)-B(3)       | 182.9      | 181.7      | 180.7        | 179.2      |
| B(1)-B(2)       | 167.0      | 167.3      | 166.7        | 166.7      |
| B(1)-B(3)       | 170.1      | 170.0      | 169.2        | 168.6      |
| B(1)-B(4)       | 172.6      | 171.6      | 171.0        | 170.2      |
| B(2)-H(11)      | 142.0      | 141.2      | 142.9        | 141.1      |
| B(4)-H(11)      | 130.3      | 130.4      | 130.4        | 130.3      |
| B(4)-H(13)      | 136.2      | 136.4      | 137.2        | 136.5      |
| B(3)-H(13)      | 133.3      | 132.9      | 132.9        | 132.7      |
| B(1)-B(2)-F(6)  | 137.5      | 136.8      | 136.9        | 136.4      |
| B(1)-B(2)-B(4)  | 58.9       | 58.8       | 58.8         | 58.8       |
| B(4)-B(2)-B(5)  | 90.7       | 90.6       | 90.6         | 90.5       |
| B(1)-B(3)-H(8)  | 128.6      | 128.3      | 127.6        | 127.2      |
| B(1)-B(3)-B(4)  | 58.4       | 58.3       | 58.4         | 58.5       |
| B(5)-B(3)-B(4)  | 90.7       | 90.6       | 90.6         | 90.6       |
| B(1)-B(4)-H(9)  | 130.4      | 130.7      | 130.3        | 130.1      |
| B(1)-B(4)-B(2)  | 55.9       | 56.5       | 56.5         | 56.9       |
| B(1)-B(4)-B(3)  | 57.1       | 57.4       | 57.4         | 57.6       |
| B(2)-B(4)-B(3)  | 89.2       | 89.3       | 89.4         | 89.4       |
| F(7)-B(1)-B(4)  | 131.1      | 131.2      | 131.3        | 131.5      |
| F(7)-B(1)-B(2)  | 131.3      | 131.8      | 132.0        | 132.3      |
| F(7)-B(1)-B(3)  | 129.4      | 129.7      | 129.8        | 130.1      |
| B(2)-H(11)-B(4) | 84.2       | 83.8       | 82.6         | 82.6       |
| B(4)-H(13)-B(3) | 85.5       | 84.9       | 84.0         | 83.5       |
| Energy          | -226.21383 | -227.48506 | -228.95005   | -228.12524 |

Table S6. Calculated geometric parameters and energies for 2-Cl-B<sub>5</sub>H<sub>8</sub> (distances in pm, angles in degrees, energy in Hartrees) from the molecular orbital study.

|                 | HF/3-21G*  | HF/6-31G*  | B3LYP/6-31G* | MP2/6-31G* |
|-----------------|------------|------------|--------------|------------|
| B(1)-H(7)       | 117.4      | 118.0      | 118.4        | 118.3      |
| B(2)-Cl(6)      | 177.6      | 178.5      | 178.8        | 177.1      |
| B(3)-H(8)       | 117.3      | 117.8      | 118.4        | 118.6      |
| B(4)-H(9)       | 117.3      | 117.8      | 118.4        | 118.6      |
| B(2)-B(4)       | 183.4      | 181.3      | 180.4        | 178.9      |
| B(4)-B(3)       | 182.3      | 181.0      | 179.9        | 178.8      |
| B(1)-B(2)       | 170.1      | 169.3      | 168.7        | 168.0      |
| B(1)-B(3)       | 170.8      | 170.1      | 169.4        | 168.8      |
| B(1)-B(4)       | 171.1      | 170.4      | 169.8        | 169.3      |
| B(2)-H(11)      | 135.6      | 135.2      | 136.8        | 136.3      |
| B(4)-H(11)      | 134.4      | 133.9      | 133.6        | 133.0      |
| B(4)-H(13)      | 135.3      | 135.0      | 135.7        | 135.2      |
| B(3)-H(13)      | 134.4      | 134.0      | 134.3        | 133.7      |
| B(1)-B(2)-Cl(6) | 131.9      | 131.9      | 132.6        | 131.8      |
| B(1)-B(2)-B(4)  | 57.7       | 58.0       | 58.1         | 58.3       |
| B(4)-B(2)-B(5)  | 90.1       | 90.4       | 90.3         | 90.4       |
| B(1)-B(3)-H(8)  | 130.9      | 130.8      | 130.2        | 129.8      |
| B(1)-B(3)-B(4)  | 57.9       | 58.0       | 58.1         | 58.2       |
| B(5)-B(3)-B(4)  | 90.8       | 90.6       | 90.6         | 90.5       |
| B(1)-B(4)-H(9)  | 132.2      | 132.2      | 131.7        | 131.1      |
| B(1)-B(4)-B(2)  | 57.2       | 57.5       | 57.5         | 57.6       |
| B(1)-B(4)-B(3)  | 57.7       | 57.8       | 57.8         | 57.9       |
| B(2)-B(4)-B(3)  | 89.6       | 89.5       | 89.5         | 89.5       |
| Cl(7)-B(1)-B(4) | 130.7      | 131.0      | 131.1        | 131.4      |
| Cl(7)-B(1)-B(2) | 130.7      | 131.1      | 131.2        | 131.2      |
| Cl(7)-B(1)-B(3) | 131.1      | 131.5      | 131.6        | 131.9      |
| B(2)-H(11)-B(4) | 85.6       | 84.7       | 83.7         | 83.2       |
| B(4)-H(13)-B(3) | 85.1       | 84.5       | 83.6         | 83.4       |
| Energy          | -584.68317 | -587.51943 | -589.29587   | -588.12202 |

Table S7. Calculated geometric parameters and energies for 2-Br-B<sub>5</sub>H<sub>8</sub> (distances in pm, angles in degrees, energy in Hartrees) from the molecular orbital study.

|                 | HF<br>/3-21G* | HF<br>/6-31G* | B3LYP<br>/6-31G* | MP2(fc)<br>/6-31G* | MP2(fc)<br>/6-311+G* | MP4(fc)(SDQ)<br>/6-31G* | MP4(SDQ)<br>/6-31G* |
|-----------------|---------------|---------------|------------------|--------------------|----------------------|-------------------------|---------------------|
| B(1)-H(7)       | 117.4         | 117.9         | 118.4            | 118.3              | 118.2                | 118.6                   | 118.6               |
| B(2)-Br(6)      | 197.1         | 193.8         | 193.6            | 193.0              | 193.6                | 193.7                   | 193.2               |
| B(3)-H(8)       | 117.3         | 117.8         | 118.5            | 118.6              | 118.5                | 118.8                   | 118.8               |
| B(4)-H(9)       | 117.2         | 117.8         | 118.4            | 118.6              | 118.5                | 118.8                   | 118.8               |
| B(2)-B(4)       | 182.2         | 181.2         | 180.2            | 178.8              | 179.5                | 179.5                   | 179.1               |
| B(4)-B(3)       | 182.4         | 180.8         | 179.8            | 178.7              | 179.6                | 179.2                   | 178.9               |
| B(1)-B(2)       | 169.9         | 169.5         | 168.6            | 168.1              | 169.2                | 168.3                   | 168.0               |
| B(1)-B(3)       | 170.8         | 170.2         | 169.6            | 169.0              | 169.9                | 169.2                   | 168.9               |
| B(1)-B(4)       | 170.8         | 170.2         | 169.7            | 169.3              | 170.2                | 169.4                   | 169.1               |
| B(2)-H(11)      | 133.4         | 134.1         | 136.0            | 135.5              | 136.2                | 135.6                   | 135.5               |
| B(4)-H(11)      | 135.7         | 134.7         | 133.9            | 133.5              | 134.5                | 133.9                   | 133.9               |
| B(4)-H(13)      | 135.0         | 134.7         | 135.5            | 135.0              | 135.9                | 135.2                   | 135.1               |
| B(3)-H(13)      | 134.9         | 134.3         | 134.3            | 133.8              | 134.6                | 134.1                   | 134.1               |
| B(1)-B(2)-Br(6) | 130.4         | 130.8         | 131.9            | 131.0              | 131.4                | 131.1                   | 131.1               |
| B(1)-B(2)-B(4)  | 57.9          | 58.0          | 58.1             | 58.3               | 58.4                 | 58.2                    | 58.2                |
| B(4)-B(2)-B(5)  | 90.7          | 90.3          | 90.3             | 90.4               | 90.5                 | 90.4                    | 90.4                |

|                 |             |             |             |             |            |            |            |
|-----------------|-------------|-------------|-------------|-------------|------------|------------|------------|
| B(1)-B(3)-H(8)  | 131.6       | 131.4       | 130.5       | 130.1       | 130.7      | 130.2      | 130.3      |
| B(1)-B(3)-B(4)  | 57.7        | 57.9        | 58.0        | 58.2        | 58.2       | 58.1       | 58.1       |
| B(5)-B(3)-B(4)  | 90.5        | 90.6        | 90.5        | 90.5        | 90.5       | 90.5       | 90.5       |
| B(1)-B(4)-H(9)  | 132.3       | 132.4       | 131.9       | 131.4       | 131.9      | 131.5      | 131.5      |
| B(1)-B(4)-B(2)  | 57.4        | 57.6        | 57.5        | 57.7        | 57.8       | 57.6       | 57.6       |
| B(1)-B(4)-B(3)  | 57.7        | 57.9        | 58.0        | 58.0        | 58.1       | 58.0       | 58.0       |
| B(2)-B(4)-B(3)  | 89.4        | 89.5        | 89.6        | 89.5        | 89.5       | 89.5       | 89.6       |
| H(7)-B(1)-B(4)  | 130.6       | 131.0       | 131.2       | 131.4       | 131.5      | 131.3      | 131.3      |
| H(7)-B(1)-B(2)  | 130.7       | 131.0       | 131.2       | 131.3       | 131.3      | 131.2      | 131.2      |
| H(7)-B(1)-B(3)  | 131.6       | 131.8       | 131.6       | 132.0       | 132.3      | 131.9      | 131.9      |
| B(2)-H(11)-B(4) | 85.2        | 84.8        | 83.8        | 83.3        | 83.1       | 83.5       | 83.3       |
| B(4)-H(13)-B(3) | 85.1        | 84.5        | 83.6        | 83.3        | 83.2       | 83.4       | 83.3       |
| Energy          | -2687.33212 | -2697.92630 | -2700.80275 | -2698.51037 | -2701.0455 | -2698.5616 | -2698.6161 |



Table S8. Calculated geometric parameters and energies for 1,2-Br<sub>2</sub>-B<sub>5</sub>H<sub>7</sub> (distances in pm, angles in degrees, energy in Hartrees) from the molecular orbital study.

|                 | HF/3-21G*   | HF/6-31G*   | B3LYP/6-31G* | MP2/6-31G*  |
|-----------------|-------------|-------------|--------------|-------------|
| B(1)-Br(7)      | 197.6       | 194.5       | 194.1        | 192.6       |
| B(2)-Br(6)      | 196.0       | 192.8       | 192.7        | 192.1       |
| B(3)-H(8)       | 117.2       | 117.7       | 118.4        | 118.5       |
| B(4)-H(9)       | 117.1       | 117.6       | 118.3        | 118.5       |
| B(2)-B(4)       | 182.4       | 181.7       | 180.5        | 179.1       |
| B(4)-B(3)       | 182.7       | 181.1       | 180.0        | 179.0       |
| B(1)-B(2)       | 168.9       | 169.3       | 168.9        | 168.3       |
| B(1)-B(3)       | 169.5       | 169.6       | 169.1        | 168.5       |
| B(1)-B(4)       | 169.8       | 169.9       | 169.6        | 169.1       |
| B(2)-H(11)      | 133.7       | 134.3       | 135.9        | 135.4       |
| B(4)-H(11)      | 135.3       | 134.4       | 133.9        | 133.7       |
| B(4)-H(13)      | 134.8       | 134.5       | 135.1        | 134.7       |
| B(3)-H(13)      | 134.9       | 134.2       | 134.4        | 134.1       |
| B(1)-B(2)-Br(6) | 130.5       | 130.3       | 130.9        | 129.0       |
| B(1)-B(2)-B(4)  | 57.6        | 57.8        | 58.0         | 58.2        |
| B(4)-B(2)-B(5)  | 90.6        | 90.2        | 90.2         | 90.4        |
| B(1)-B(3)-H(8)  | 131.5       | 131.1       | 130.3        | 130.1       |
| B(1)-B(3)-B(4)  | 57.5        | 57.8        | 58.0         | 58.1        |
| B(5)-B(3)-B(4)  | 90.5        | 90.6        | 90.5         | 90.4        |
| B(1)-B(4)-H(9)  | 132.0       | 131.8       | 131.2        | 130.6       |
| B(1)-B(4)-B(2)  | 57.2        | 57.5        | 57.6         | 57.7        |
| B(1)-B(4)-B(3)  | 57.4        | 57.7        | 57.8         | 57.8        |
| B(2)-B(4)-B(3)  | 89.5        | 89.6        | 89.7         | 89.6        |
| Br(7)-B(1)-B(4) | 130.2       | 130.7       | 131.1        | 131.3       |
| Br(7)-B(1)-B(2) | 130.3       | 130.4       | 130.4        | 129.7       |
| Br(7)-B(1)-B(3) | 130.9       | 131.6       | 132.1        | 133.2       |
| B(2)-H(11)-B(4) | 85.4        | 85.1        | 84.0         | 83.4        |
| B(4)-H(13)-B(3) | 85.3        | 84.8        | 83.8         | 83.5        |
| Energy          | -5246.84750 | -5267.27637 | -5271.94377  | -5267.97099 |

Table S9. Interatomic distances ( $r/\text{pm}$ ) and amplitudes of vibration ( $u/\text{pm}$ ) for the refined GED structure of 1-Br-B<sub>5</sub>H<sub>8</sub>.<sup>a</sup>

| No. | Atom pair      | $r_a/\text{pm}$ | $u/\text{pm}^b$ | Restraint <sup>c</sup> |
|-----|----------------|-----------------|-----------------|------------------------|
| 1   | H(6)-B(2)      | 120.2           | 7.3(6)          | 8.1(8)                 |
| 2   | H(11)-B(2)     | 135.0           | 11.1(7)         | 11.0(10)               |
| 3   | B(2)-B(1)      | 170.4           | 7.1(3)          |                        |
| 4   | B(4)-B(2)      | 176.2           | 7.9(4)          |                        |
| 5   | Br(10)-B(1)    | 189.7           | 4.7(4)          | 5.0(5)                 |
| 6   | H(12)...H(11)  | 190.7           | 15.5(fixed)     |                        |
| 7   | H(11)...H(6)   | 204.5           | 14.5(fixed)     |                        |
| 8   | H(11)...B(1)   | 247.4           | 10.6(fixed)     |                        |
| 9   | B(3)...B(2)    | 249.0           | 9.8(10)         |                        |
| 10  | H(11)...B(3)   | 256.3           | 11.9(8)         | 12.4(10)               |
| 11  | H(6)...B(1)    | 264.0           | 11.4(fixed)     |                        |
| 12  | H(13)...H(11)  | 269.0           | 18.3(fixed)     |                        |
| 13  | H(6)...B(4)    | 273.3           | 11.5(9)         |                        |
| 14  | Br(10)...B(2)  | 329.7           | 10.6(2)         |                        |
| 15  | H(8)...H(6)    | 343.1           | 17.7(fixed)     |                        |
| 16  | H(11)...H(7)   | 366.3           | 14.6(fixed)     |                        |
| 17  | H(6)...B(3)    | 367.6           | 9.8(fixed)      |                        |
| 18  | Br(10)...H(6)  | 379.4           | 18.5(15)        | 19.0(20)               |
| 19  | H(11)...Br(10) | 418.5           | 12(7)           | 11.7(10)               |
| 20  | H(7)...H(6)    | 485.4           | 12.5(fixed)     |                        |

<sup>a</sup> Estimated standard deviations, obtained in the least-squares refinement, are given in parentheses.

<sup>b</sup> Amplitudes not refined were fixed at the values obtained using the B3LYP/6-31G\* force field.

<sup>c</sup> Restraints were also applied to the ratios of  $u_3/u_4$  [0.94(5)] and  $u_{10}/u_{13}$  [1.06(5)]. Uncertainties are 5% of the amplitude ratios.

Table S10. Least-squares correlation matrix (x100) for 1-Br-B<sub>5</sub>H<sub>8</sub>.<sup>a</sup>

|                        | <i>p</i> <sub>2</sub> | <i>p</i> <sub>3</sub> | <i>u</i> <sub>3</sub> | <i>u</i> <sub>4</sub> | <i>u</i> <sub>11</sub> | <i>k</i> <sub>2</sub> |
|------------------------|-----------------------|-----------------------|-----------------------|-----------------------|------------------------|-----------------------|
| <i>p</i> <sub>1</sub>  | 62                    | -73                   | 11                    | -64                   |                        |                       |
| <i>p</i> <sub>2</sub>  |                       |                       | -57                   |                       |                        |                       |
| <i>p</i> <sub>3</sub>  |                       |                       |                       | 63                    |                        |                       |
| <i>u</i> <sub>1</sub>  |                       |                       |                       |                       |                        | 65                    |
| <i>u</i> <sub>10</sub> |                       |                       |                       |                       | 81                     |                       |

<sup>a</sup> Only elements with absolute values  $\geq 50\%$  are shown.

Table S11. Interatomic distances ( $r_d$ /pm) and amplitudes of vibration ( $u$ /pm) for the refined GED structure of 2-Br-B<sub>5</sub>H<sub>8</sub>.<sup>a</sup>

| No. | Atom pair     | $r_d$ /pm | $u$ /pm <sup>b</sup>   | Restraint <sup>c</sup> |
|-----|---------------|-----------|------------------------|------------------------|
| 1   | H(10)-B(5)    | 125.4(8)  | 8.2(fixed)             |                        |
| 2   | H(7)-B(1)     | 125.7(8)  | 8.3(fixed)             |                        |
| 3   | H(8)-B(3)     | 125.8(8)  | 8.3(fixed)             |                        |
| 4   | H(12)-B(5)    | 134.3(13) | 10.9(fixed)            |                        |
| 5   | H(14)-B(3)    | 134.7(6)  | 11.0(fixed)            |                        |
| 6   | H(14)-B(5)    | 135.8(6)  | 11.2(fixed)            |                        |
| 7   | H(12)-B(2)    | 136.3(13) | 11.5(fixed)            |                        |
| 8   | B(5)-B(1)     | 170.5(6)  | 8.1(4)                 |                        |
| 9   | B(3)-B(1)     | 171.1(6)  | 8.1(tied to $u_8$ )    |                        |
| 10  | B(2)-B(1)     | 171.7(6)  | 8.1(tied to $u_8$ )    |                        |
| 11  | B(5)-B(2)     | 180.3(4)  | 8.0(6)                 | 6.7(7)                 |
| 12  | B(5)-B(3)     | 180.8(5)  | 7.9(tied to $u_{11}$ ) |                        |
| 13  | H(12)...H(14) | 190.1(19) | 16.1(fixed)            |                        |
| 14  | Br(6)-B(2)    | 195.0(4)  | 5.9(6)                 |                        |
| 15  | H(11)...H(12) | 197.2(37) | 16.3(fixed)            |                        |
| 16  | H(13)...H(14) | 197.9(27) | 16.1(fixed)            |                        |
| 17  | H(12)...H(10) | 207.0(63) | 15.0(fixed)            |                        |
| 18  | H(14)...H(10) | 208.5(65) | 15.2(fixed)            |                        |
| 19  | H(14)...H(8)  | 209.2(15) | 15.0(fixed)            |                        |
| 20  | H(14)...B(1)  | 244.7(11) | 10.7(fixed)            |                        |
| 21  | H(12)...B(1)  | 245.0(11) | 10.7(fixed)            |                        |
| 22  | B(3)...B(2)   | 253.1(8)  | 6.3(7)                 |                        |
| 23  | H(12)...B(3)  | 256.4(13) | 12.5(fixed)            |                        |
| 24  | B(4)...B(5)   | 257.6(13) | 6.2(tied to $u_{22}$ ) |                        |
| 25  | H(14)...B(2)  | 258.8(10) | 12.7(fixed)            |                        |
| 26  | H(12)...B(4)  | 262.1(17) | 12.7(fixed)            |                        |
| 27  | H(14)...B(4)  | 263.3(16) | 12.6(fixed)            |                        |
| 28  | H(8)...B(1)   | 269.1(15) | 12.0(fixed)            |                        |
| 29  | H(7)...B(5)   | 269.2(12) | 11.8(fixed)            |                        |
| 30  | H(7)...B(2)   | 270.8(10) | 11.8(fixed)            |                        |

|    |               |            |                         |          |
|----|---------------|------------|-------------------------|----------|
| 31 | H(10)...B(1)  | 271.9(64)  | 11.8(fixed)             |          |
| 32 | H(7)...B(3)   | 272.3(13)  | 11.8(fixed)             |          |
| 33 | H(12)...H(13) | 273.6(21)  | 19.1(fixed)             |          |
| 34 | H(12)...Br(6) | 274.3(21)  | 13.8(12)                | 14.4(14) |
| 35 | H(8)...B(5)   | 281.9(8)   | 11.8(fixed)             |          |
| 36 | H(10)...B(2)  | 282.3(9)   | 11.8(fixed)             |          |
| 37 | H(10)...B(3)  | 283.4(9)   | 11.7(fixed)             |          |
| 38 | Br(6)...B(1)  | 328.0(12)  | 11.3(tied to $u_{41}$ ) |          |
| 39 | H(7)...H(8)   | 336.7(27)  | 20.6(fixed)             |          |
| 40 | H(7)...H(10)  | 337.7(104) | 20.2(fixed)             |          |
| 41 | Br(6)...B(5)  | 343.7(3)   | 11.4(6)                 |          |
| 42 | H(7)...H(12)  | 354.5(13)  | 13.8(fixed)             |          |
| 43 | H(7)...H(14)  | 354.7(15)  | 13.9(fixed)             |          |
| 44 | H(10)...H(8)  | 355.9(14)  | 18.2(fixed)             |          |
| 45 | H(12)...H(8)  | 371.9(17)  | 14.9(fixed)             |          |
| 46 | H(7)...Br(6)  | 375.7(23)  | 21.0(20)                | 20.9(20) |
| 47 | H(8)...B(2)   | 376.9(11)  | 10.2(fixed)             |          |
| 48 | H(12)...H(9)  | 377.1(41)  | 15.1(fixed)             |          |
| 49 | H(14)...H(9)  | 378.4(37)  | 15.0(fixed)             |          |
| 50 | H(10)...B(4)  | 381.3(15)  | 10.1(fixed)             |          |
| 51 | H(10)...Br(6) | 404.9(15)  | 15.2(16)                | 18.4(20) |
| 52 | H(14)...Br(6) | 442.3(11)  | 17.6(12)                |          |
| 53 | Br(6)...B(3)  | 445.2(6)   | 9.2(5)                  |          |
| 54 | H(9)...H(10)  | 504.7(26)  | 12.8(fixed)             |          |
| 55 | H(8)...Br(6)  | 567.6(10)  | 10.7(fixed)             |          |

<sup>a</sup> Estimated standard deviations, obtained in the least-squares refinement, are given in parentheses.

<sup>b</sup> Amplitudes not refined were fixed at the values obtained using the B3LYP/6-31G\* force field.

<sup>c</sup> A restraint was also applied to the ratio  $u_{53}/u_{52}$  [0.53(3)]. The uncertainty is 5% of the amplitude ratio.

Table S12. Least-squares correlation matrix (x100) for 2-Br-B<sub>5</sub>H<sub>8</sub>.<sup>a</sup>

|                        | <i>p</i> <sub>14</sub> | <i>u</i> <sub>1</sub> | <i>u</i> <sub>5</sub> | <i>u</i> <sub>6</sub> | <i>u</i> <sub>10</sub> |
|------------------------|------------------------|-----------------------|-----------------------|-----------------------|------------------------|
| <i>p</i> <sub>1</sub>  | -68                    |                       |                       | 69                    |                        |
| <i>p</i> <sub>4</sub>  |                        |                       | -59                   |                       |                        |
| <i>p</i> <sub>19</sub> |                        | 68                    |                       |                       |                        |
| <i>u</i> <sub>2</sub>  |                        |                       | 54                    | 72                    |                        |
| <i>u</i> <sub>4</sub>  |                        |                       |                       |                       | 61                     |
| <i>u</i> <sub>5</sub>  |                        |                       |                       | 53                    |                        |

<sup>a</sup> Only elements with absolute values  $\geq 50\%$  are shown.

Figure S1. Experimental and final weighted difference (experimental – theoretical) molecular-scattering intensities for 1-Br-B<sub>5</sub>H<sub>8</sub>.

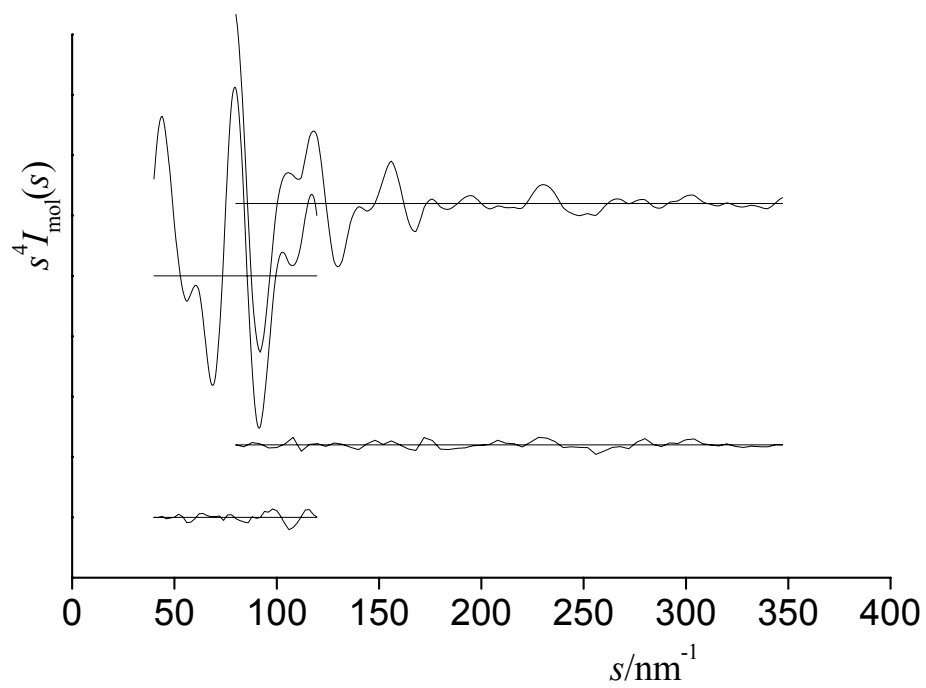

Figure S2. Experimental and final weighted difference (experimental – theoretical) molecular-scattering intensities for 2-Br-B<sub>5</sub>H<sub>8</sub>.

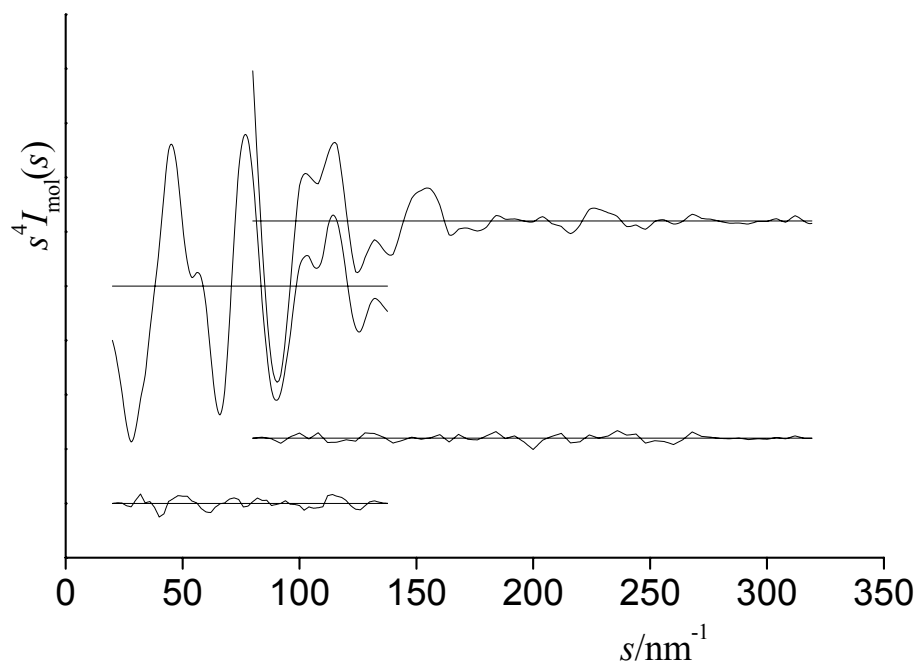

Supplement: b402688h.pdf [file b402688h.pdf]
